# Supplementary material for: Knockout of cyclin-dependent kinases 8 and 19 leads to depletion of cyclin C and suppresses spermatogenesis and male fertility in mice
Source: eLife journal article supplement (doi:10.7554/elife.96465), 2024-05-01
Supplement: fig2-data1 [file elife-96465-fig2-data1-v1.zip]

**CDK8**

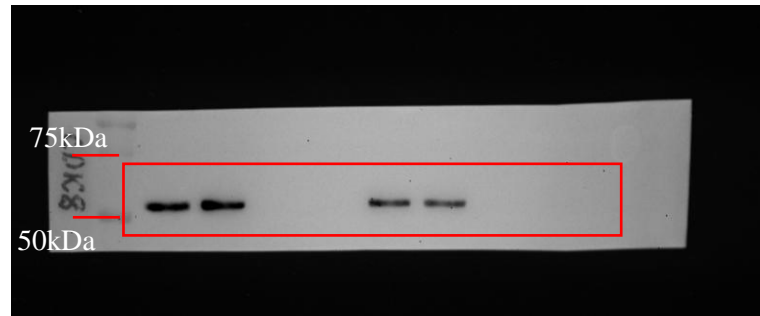

**pSTAT1 S727**

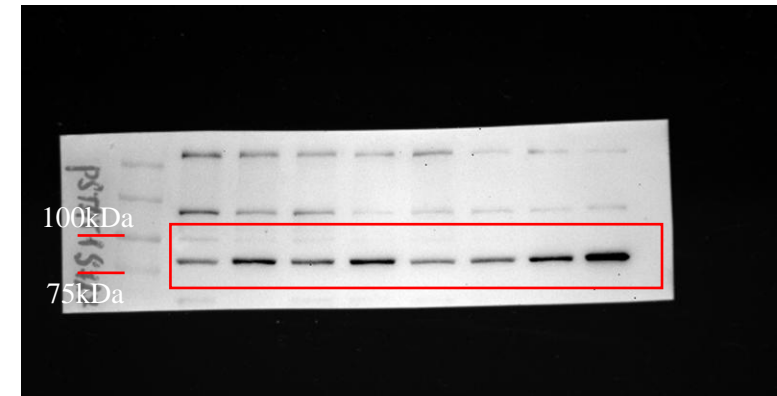

**CDK19**

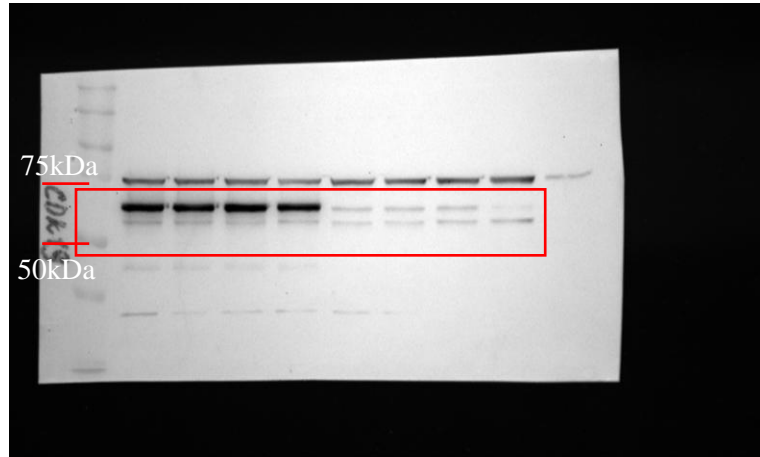

**b-actin**

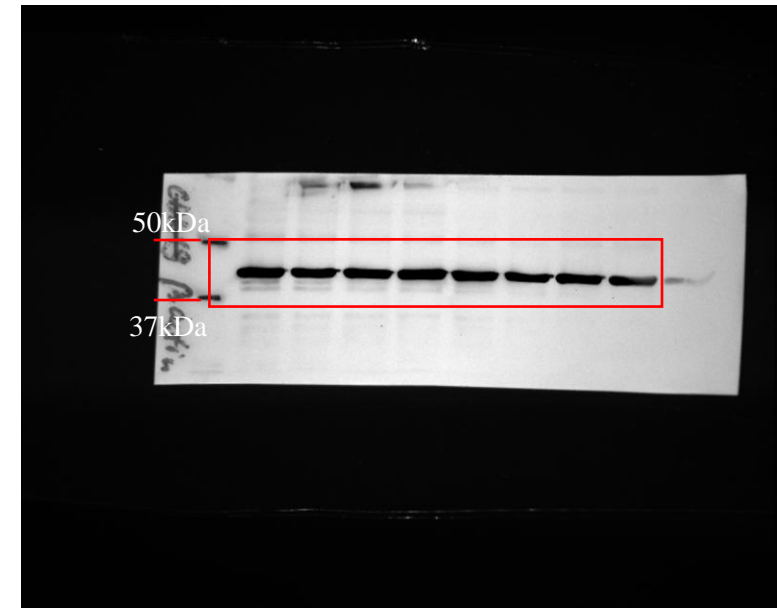

**Cyclin C**

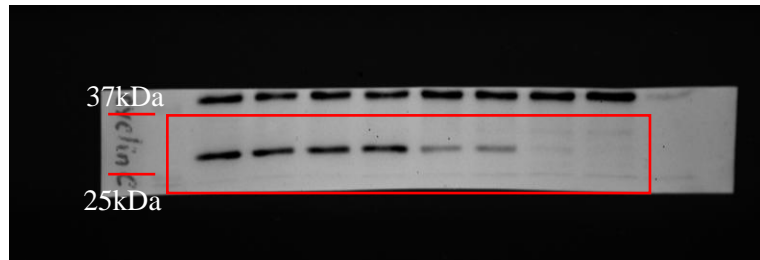

**Figure 2 - source data 1.** Original membranes corresponding to Figure 2, panel D.
