# Supplementary material for: Knockout of cyclin-dependent kinases 8 and 19 leads to depletion of cyclin C and suppresses spermatogenesis and male fertility in mice
Source: eLife journal article supplement (doi:10.7554/elife.96465), 2024-05-01
Supplement: fig2-figsupp1-data1 [file elife-96465-fig2-figsupp1-data1-v1.zip]

CDK19 + b-actin

CDK8 + CDK19 + b-actin

CDK8 (high exposure)

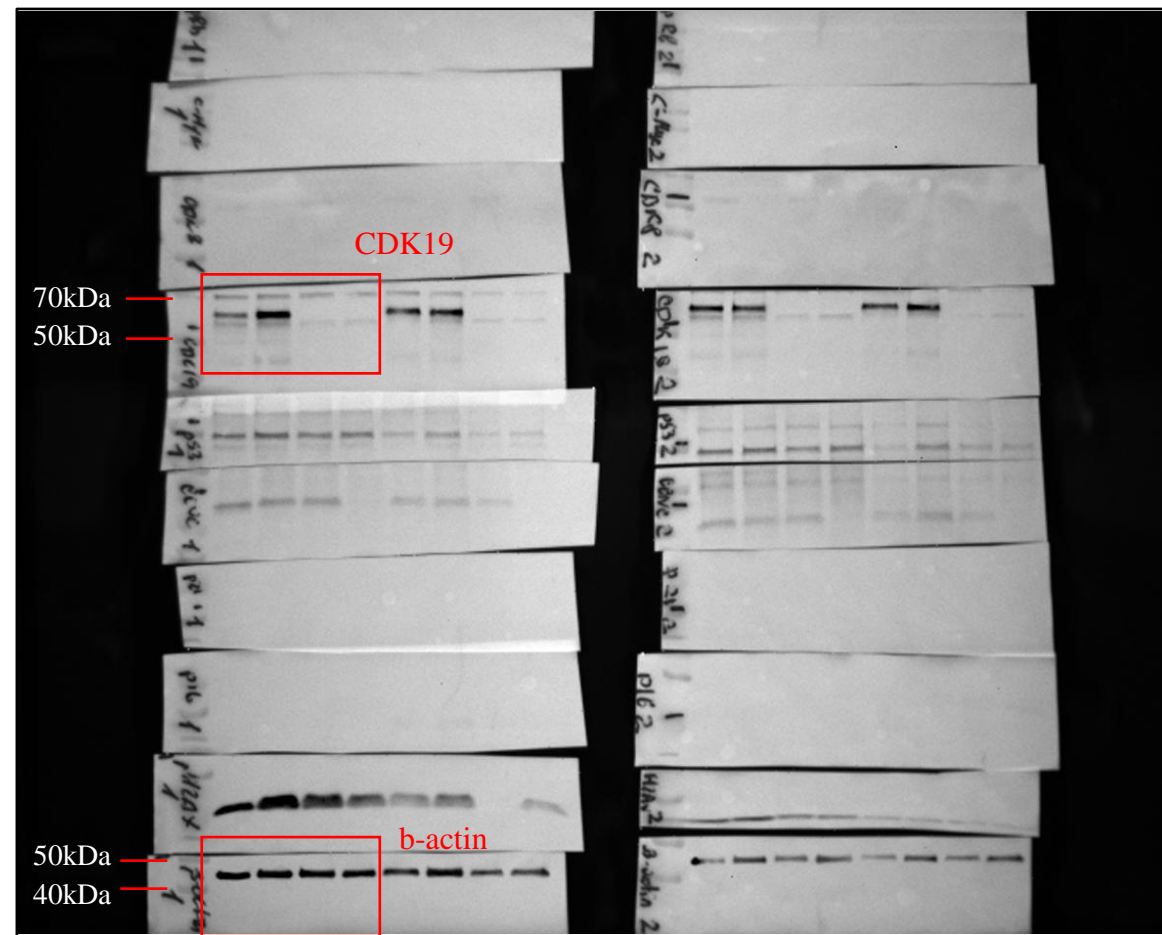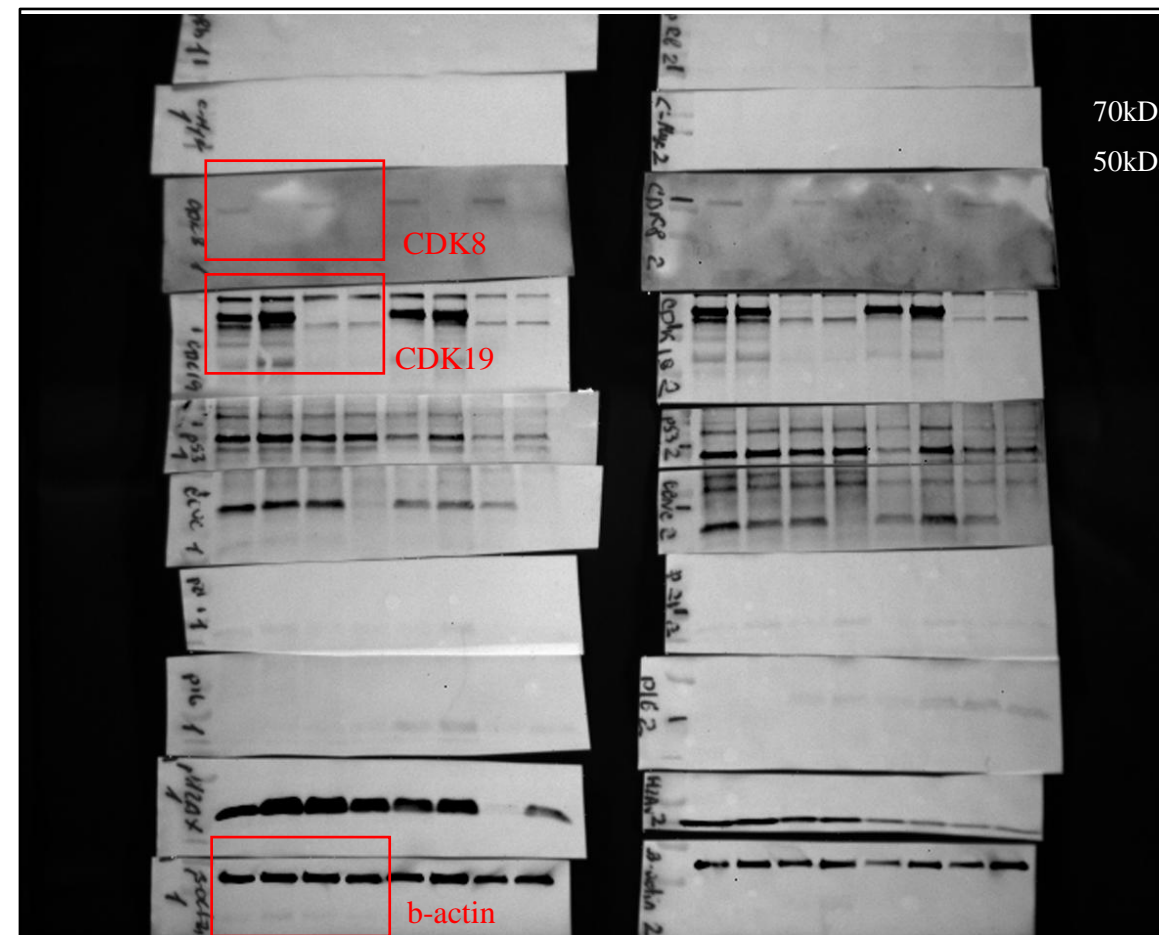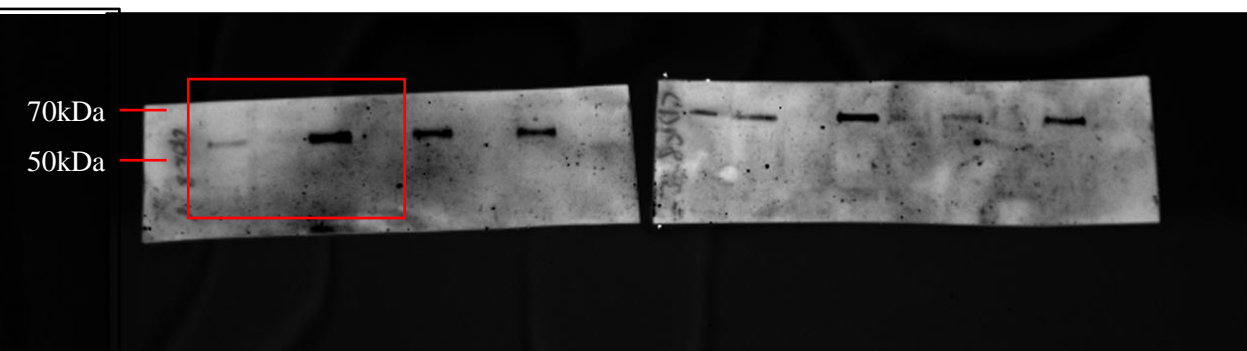

Figure 1-figure supplement 7-source data 1. Original membranes corresponding to Figure 1, supplemental file 7.
