# Supplementary material for: Knockout of cyclin-dependent kinases 8 and 19 leads to depletion of cyclin C and suppresses spermatogenesis and male fertility in mice
Source: eLife journal article supplement (doi:10.7554/elife.96465), 2024-05-01
Supplement: fig6-data1 [file elife-96465-fig6-data1-v1.zip]

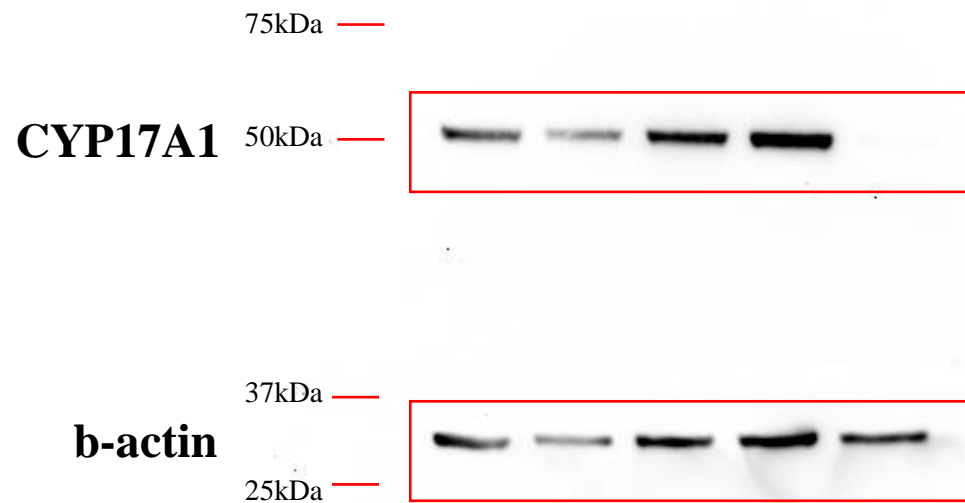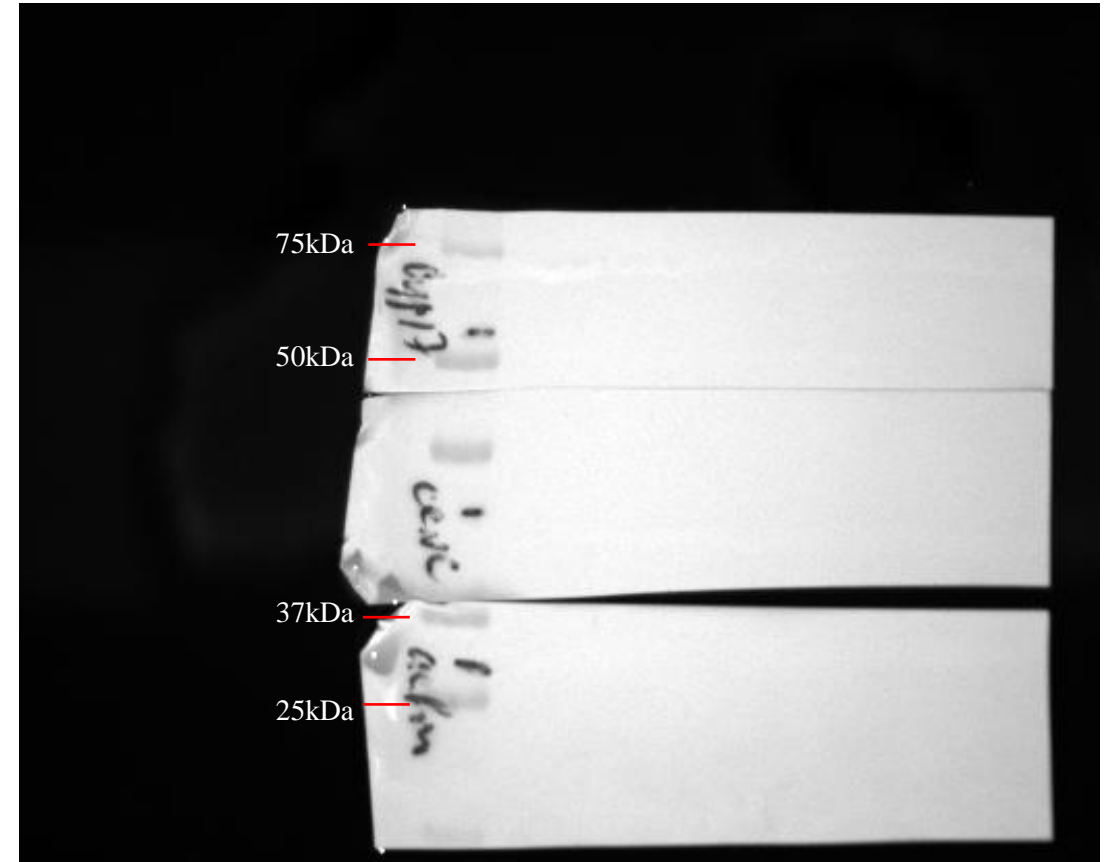

**Figure 6 - source data 1.** Original membranes corresponding to Figure 6, panel B. On the right figure are membranes with molecular weight markers.
