# Supplementary figures and images for: Knockout of cyclin-dependent kinases 8 and 19 leads to depletion of cyclin C and suppresses spermatogenesis and male fertility in mice
Source: eLife journal article supplement (doi:10.7554/elife.96465), 2024-05-01

**CYP17A1**

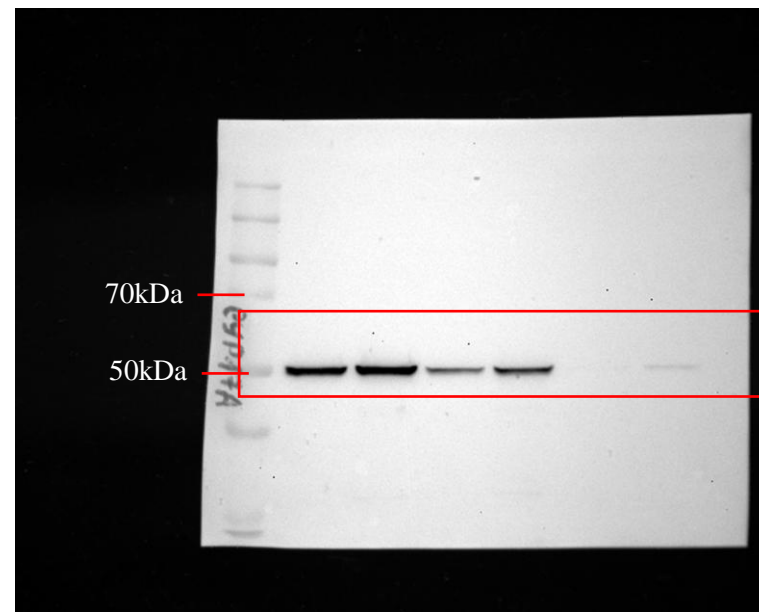

**b-actin**

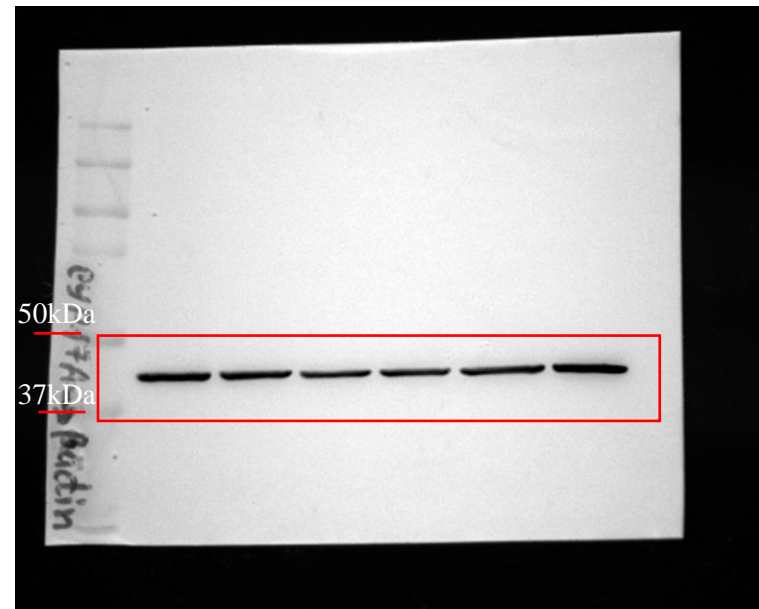

**Figure 7 - source data 1.** Original membranes corresponding to Figure 7, panel E.

Supplement: fig7-data1 [file elife-96465-fig7-data1-v1.zip]
